# Supplementary material for: A direct Z-scheme mechanism for selective hydrogenation of aromatic nitro compounds over a hybrid photocatalyst composed of ZnIn2S4 and WO3 nanorods
Source: Royal Society of Chemistry journal article supplement (doi:10.1039/d0nj06089e), 2021-01-01
Supplement: d0nj06089e1.pdf [file d0nj06089e1.pdf]

**A Direct Z-scheme Mechanism for Selective Hydrogenation of Aromatic Nitro Compounds  
over a hybrid photocatalyst composed of ZnIn<sub>2</sub>S<sub>4</sub> and WO<sub>3</sub> Nanorods**

Zhi-Yu Liang<sup>a,b,c</sup>, Ren-Kun Huang<sup>a,b</sup>, Ruo-Wen Liang<sup>a,b</sup>, Dan-hua Xie<sup>a,b</sup>, Gui-Yang Yan<sup>a,b\*</sup>

<sup>a</sup>Fujian Provincial Key Laboratory of Featured Materials in Biochemical Industry, College of Chemistry and Materials, Ningde Normal University, Fujian 352100, China

<sup>b</sup>Fujian Province University Key Laboratory of Green Energy and Environment Catalysis, College of Chemistry and Materials, Ningde Normal University, Fujian 352100, China

<sup>c</sup>Fujian Provincial Key Laboratory of Toxicology, Ningde Normal University, Fujian 352100, China

\*Corresponding author. Fax: +86 0593 2954127

E-mail: [ygyfjnu@163.com](mailto:ygyfjnu@163.com)

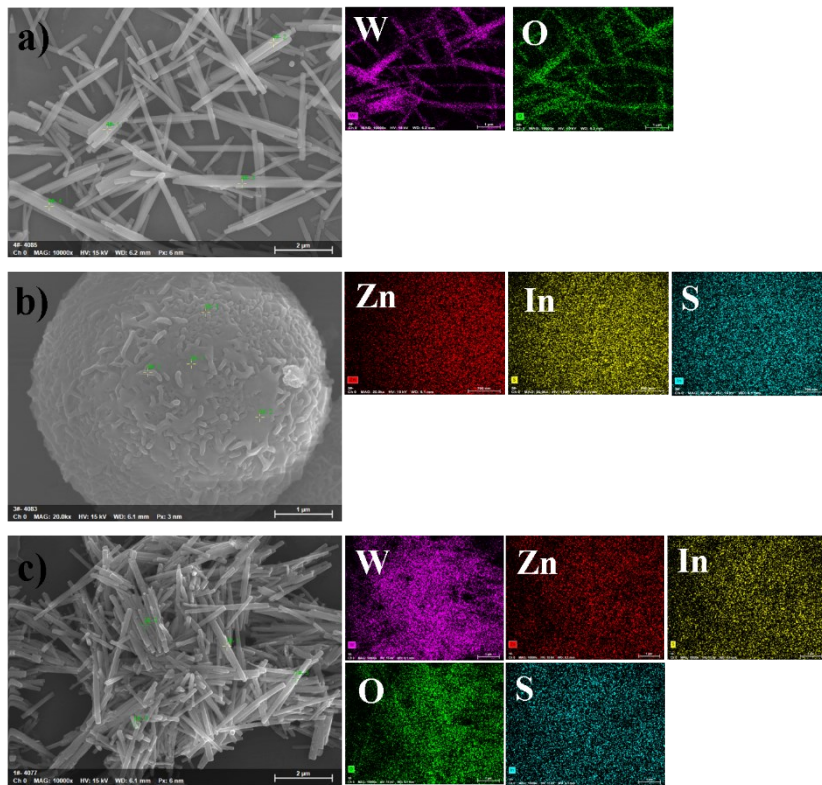

**Fig. S1.** SEM images, elemental mapping image and EDS results of (a) WO<sub>3</sub> NRs, (b) ZIS and (c) 8%ZIS-W nanocomposite

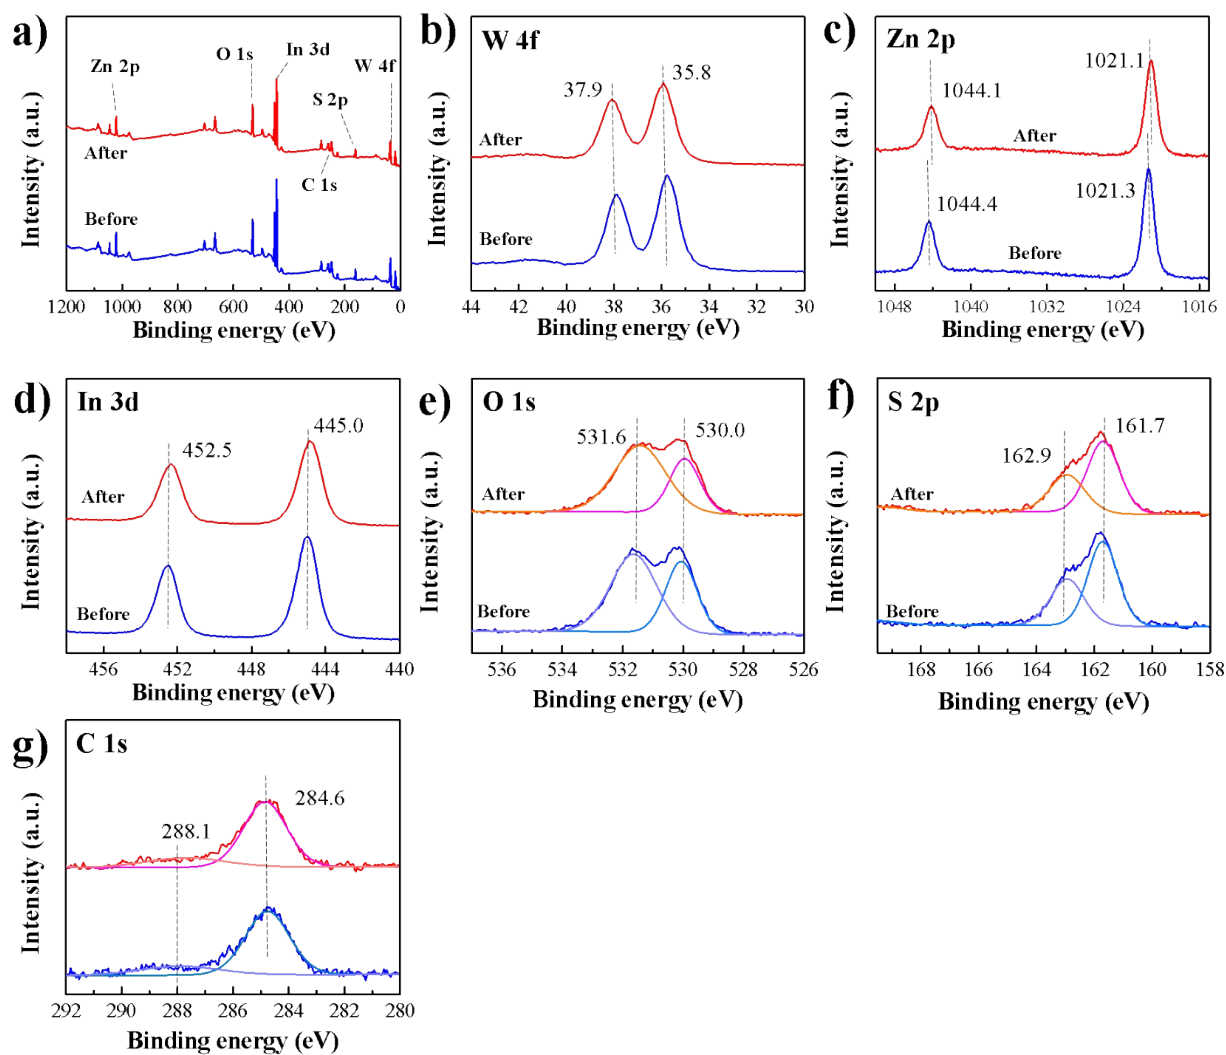

**Fig. S2.** (a) Survey and high-resolution XPS spectra of (b) W 4f, (c) Zn 2p, (d) In 3d, (e) O 1s, (f) S 2P and (g) C 1s for 8%ZIS-W nanocomposite before and after 5 cycles.

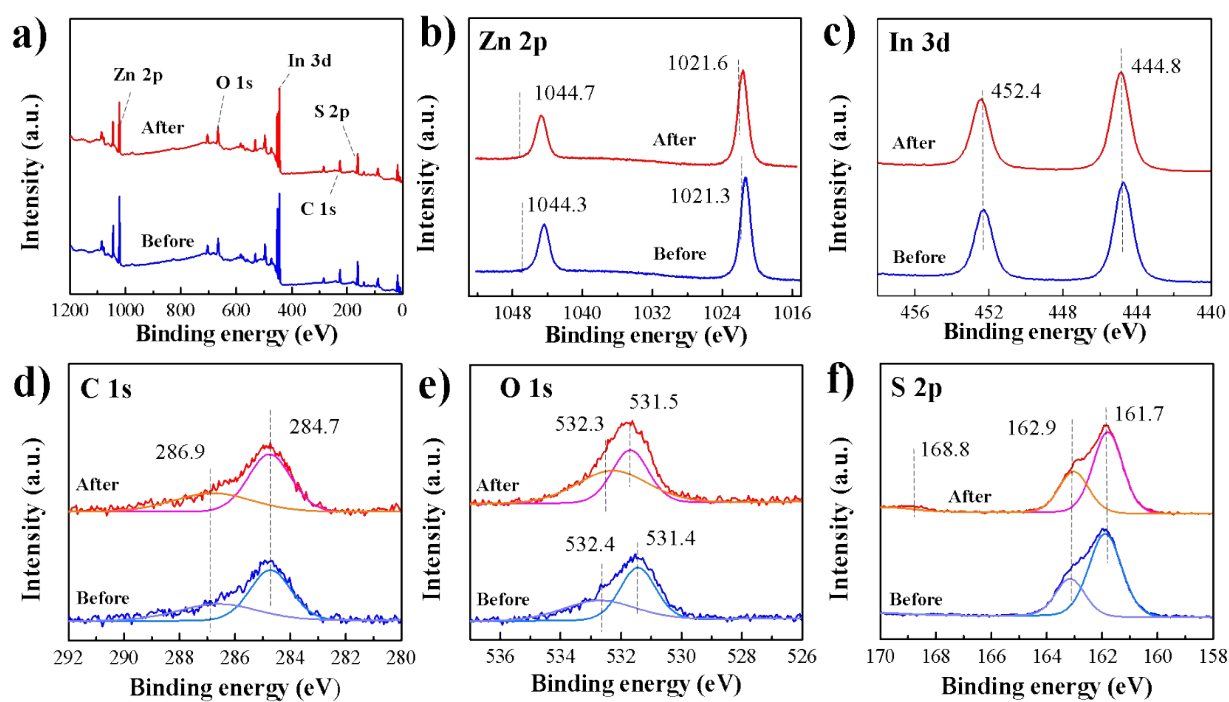

**Fig. S3.** (a) Survey and high-resolution XPS spectra of (b) Zn 2p, (c) In 3d, (d) C 1s, (e) O 1s and (f) S 2P for ZIS before and after 5 cycles.

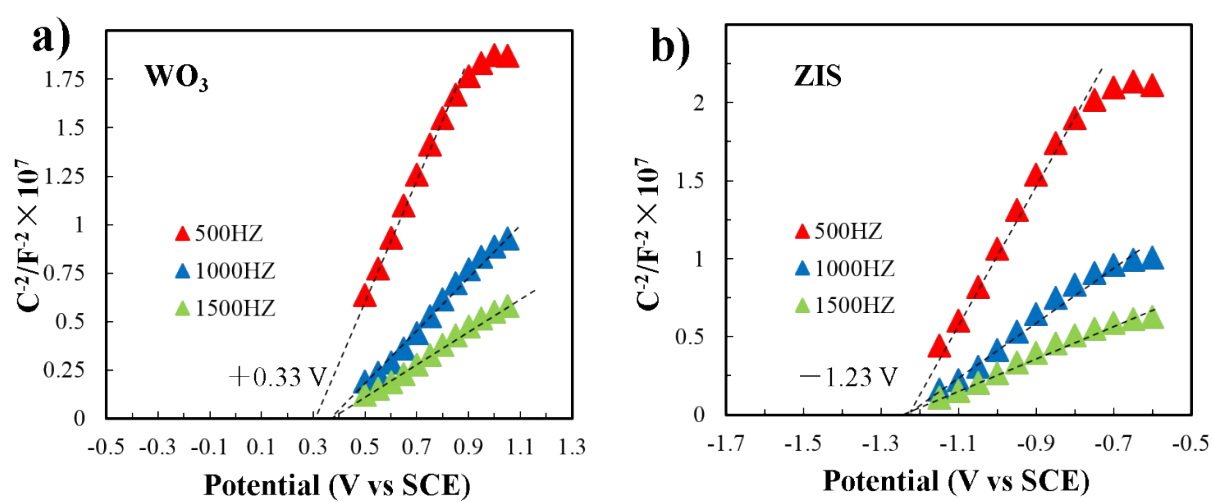

**Fig. S4.** Mott-Schottky results of (a)  $\text{WO}_3$  NRs and (b) ZIS with different frequencies.
